# Supplementary material for: Production of Low-Potassium Content Melon Through Hydroponic Nutrient Management Using Perlite Substrate
Source: Front Plant Sci. 2018 Sep 19;9:1382. doi: 10.3389/fpls.2018.01382 (PMC6157450; doi:10.3389/fpls.2018.01382)
Supplement: Supplementary file 3 [file Table_3.docx]

**Supplementary Table S3.** Nutrient solution supply schedule for melon grown in hydroponics (10 plants) and in perlite substrate (60 plants) (Experiment I)

| **Vegetative growth stages (weeks)** | | | | **Reproductive growth stages (weeks)** | | | | | | |
| --- | --- | --- | --- | --- | --- | --- | --- | --- | --- | --- |
| 1st | 2nd | 3rd | 4th | 5th | 6th | 7th | 8th | 9th | 10th | 11th |
| 50% standard nutrient solution | | * | | 50% standard nutrient solution without KNO3 till harvest. | | | | | | |

*Melon plants were supplied with KNO3 in four splits viz. 50, 75, 100 and 125% of required KNO3 (Asao et al., 2013);

*The amount of KNO3 required per plant was calculated in hydroponic culture of melon;

*Plants grown with 50% standard nutrient solution in perlite and in hydroponics were used as control.
